1 **Title:**

2 Biological machine learning combined with bacterial population genomics reveals common  
3 and rare allelic variants of genes to cause disease

4

5 **Authors:**

6 DJ Darwin R. Bandoy<sup>1,2</sup> and Bart C. Weimer<sup>1\*</sup>

7

8 **Affiliations:**

9 <sup>1</sup>University of California Davis, School of Veterinary Medicine, 100 K Pathogen Genome Project,  
10 Davis, CA 95616, USA; <sup>2</sup>University of the Philippines Los Baños, College of Veterinary  
11 Medicine, Department of Veterinary Paraclinical Sciences, Laguna 4031, Philippines

12

13 \*corresponding author: [bcweimer@ucdavis.edu](mailto:bcweimer@ucdavis.edu); 530-760-9550

14

15

16

17 **Key words:**

18 Infectious disease, XGboost, *Campylobacter*, abortion, protein modeling

## 19 **Abstract**

20 Highly dimensional data generated from bacterial whole genome sequencing is providing  
21 unprecedented scale of information that requires appropriate statistical frameworks of analysis  
22 to infer biological function from bacterial genomic populations. Application of genome wide  
23 association study (GWAS) methods is an emerging approach with bacterial population  
24 genomics that yields a list of genes associated with a phenotype with an undefined importance  
25 among the candidates in the list. Here, we validate the combination of GWAS, machine  
26 learning, and pathogenic bacterial population genomics as a novel scheme to identify SNPs and  
27 rank allelic variants to determine associations for accurate estimation of disease phenotype.  
28 This approach parsed a dataset of 1.2 million SNPs that resulted in a ranked importance of  
29 associated alleles of *Campylobacter jejuni porA* using multiple spatial locations over a 30-year  
30 period. We validated this approach using previously proven laboratory experimental alleles from  
31 an *in vivo* guinea pig abortion model. This approach, termed BioML, defined intestinal and  
32 extraintestinal groups that have differential allelic variants that cause abortion. Divergent  
33 variants containing indels that defeated gene callers were rescued using biological context and  
34 knowledge that resulted in defining rare and divergent variants that were maintained in the  
35 population over two continents and 30 years. This study defines the capability of machine  
36 learning coupled to GWAS and population genomics to simultaneously identify and rank alleles  
37 to define their role in abortion, and more broadly infectious disease.

## 38 39 **Main**

40 Comparative microbial genomics has emerged from pangenome comparisons that are  
41 exclusively tied to reference genomes that define the perspective of change to a core and  
42 flexible genome perspective lacking a firm confirmation of which genes are linked to disease<sup>1</sup>.  
43 An alternative approach to this perspective is use of genome wide association (GWAS) methods  
44 that are common in mammalian genomics in an effort to refine the estimates of specific genes of

45 interest. A limitation of GWAS is that it sequentially examines single loci that prevents  
46 simultaneous analysis of different allelic variants that can be interacting at different levels and  
47 population distribution between strain differentiation<sup>2</sup>. This is a severe limitation in bacterial  
48 genomics, especially as population genomics is now possible in bacteria at a scale that allows  
49 examination of non-linear evolutionary rates of each gene and all of the alleles found in very  
50 large populations that create big data analytical problems. A compounding limitation is the lack  
51 of appropriate statistical models that underpin this approach in bacteria since it is unknown  
52 when the populations are normally distributed or evolving in a non-linear progression. As with all  
53 large data sets, multiple comparisons require Bonferroni correction to adjust the  $p$ -value based  
54 on a new scale as compared to gene expression but it is on a scale that is beyond that  
55 contemplated for gene expression variation (Table 1)<sup>3</sup>. Further, the assumption that each gene  
56 or allele is independent is conceptually flawed; and hence, alternative analyses that are  
57 biological and statistically compatible needs to be defined.

58 Coupling GWAS, population microbial genomics, and machine learning is poised to be a  
59 robust alternative to classical GWAS or pangenome comparison to simultaneously discover  
60 changes in microbial genomes, and genes, that span the scale of genome plasticity to alleles of  
61 a single gene. Moreover, this combination (coined BioML) will produce a statistically  
62 underpinned comparative ranking of the most important factors that are not obvious from GWAS  
63 alone. These advantages combined with downstream inspection of the prioritized rank further  
64 powers discovery to bring biologically insightful observations and solutions, especially when  
65 large genome populations are used in the analysis, from very divergent populations of alleles  
66 that are missed when gene calling is too divergent.

67 An analytical strength for use of machine learning in microbiology is the ability to define  
68 functional relationship from population scale genomes or genes without a priori definition of the  
69 underlying mechanism of change or specific phenotype limitations<sup>4</sup>. This distinctive advantage  
70 makes machine learning superior to classical statistical tests for prokaryotic systems that are

71 highly variable, particularly bacteria wherein explanatory variables are not linearly correlated,  
72 features are dependent due to genome linkage, varying evolutionary rates of between genes,  
73 and assumptions of normal distribution are violated in part due to varying selection conditions<sup>2,5</sup>.  
74 These biological conditions and parameters are incompatible with the assumptions of linear or  
75 correlative statistics, which is compounded with data reduction methods that provide a very  
76 small snapshot of the genome variation that yield associations that have low predictive value.

77 In this study, we verified the concept of coupling GWAS with machine learning and  
78 population bacterial genomics (Figure 1) in a use case to test the hypothesis that a specific  
79 gene (*porA*) is linked to extraintestinal location and further is causative in abortion<sup>6-8</sup> in a ranked  
80 order that is biologically meaningful. This was done using a wet lab validated data set containing  
81 100 genomes<sup>6-8</sup> using extreme gradient boosting (XGboost), which was used in biological  
82 applications previously<sup>9</sup>. XGboost can identify genetic variants in human GWAS as  
83 demonstrated in a Finnish study that integrated complex nonlinear interactions of SNPs<sup>10</sup>. The  
84 ability to interrogate the predictive features enables whiteboxing the parameters, which is  
85 emerging as a tool for deriving mechanistic function in biology<sup>11</sup>. XGboost implements adaptive  
86 optimization within the functional space by iteration of the weak learners into strong learners  
87 represented by decision trees where each new decision tree is generated by factoring the  
88 residual generated from the difference from observed to the predicted feature (Figure 2;  
89 Supplemental Table 1).

90 This study used a previously validated wet lab data set with a tetracycline resistant strain of  
91 *Campylobacter jejuni* causing abortion in sheep<sup>6-8</sup>. Their studies used a pairwise genome  
92 comparison to identify 8,000 SNP difference between a reference genome and abortive strain  
93 and utilized transformed genomes to identify specific allelic variants driving abortion. We utilized  
94 those 85 genomes that span 30 years and multiple locations as a reference set of cases and  
95 108 control genomes of intestinal, diarrheal isolates. This approach allows exploration of  
96 bacterial population genomic space by linking different phenotypes to the genome variation

97 among the isolates (Figure 1). Biological feature engineering of this collection of genomes  
98 identified 1.2 million SNPs, which is not tractable using in vivo infection studies to determine the  
99 roll of all SNPs. To examine this scale problem, we hypothesized that genomic changes evolved  
100 in gastrointestinal *C. jejuni* resulting in an abortive phenotype; hence, moving from the intestine  
101 to other tissues – in this case the placenta resulting in abortion. Applying our approach (BioML)  
102 to a population of gastrointestinal, diarrheal *C. jejuni* versus extraintestinal, abortive phenotypes  
103 produced a prioritized allelic difference in a ranked order of importance to the phenotype (i.e.  
104 abortion) (Supplementary Table 1).

105 BioML identified 14 *porA* loci as the most important alleles ranging from 89 to 59 relative  
106 importance out of the 1.2 million SNPs (Supplemental Table 1). These ranked loci were  
107 compared by body location (Figure 3), which further clarified the location of these SNPs in a  
108 Tetris plot that simultaneously presented the ranked associated allelic variants within the  
109 phenotype of interest as detected with BioML as well as the non-associated alleles. By  
110 presenting the cases and control simultaneously within the y-axis, capturing insight is easily  
111 observed and areas for further investigation can be prioritized with visual inspection combined  
112 with biological knowledge. An added feature of the Tetris plot, which is lacking in Manhattan  
113 plots, is the ability to detect rare variants that are not captured by gene calling, machine learning  
114 alone, or classical statistical testing. Regions within cases expressing different allelic patterns  
115 were further explored for each genome and implications in biological features important in the  
116 disease. Additionally, protein structures were modeled to examine the changes in protein  
117 configuration initially yielded three distinct groups (Figure 3). These alleles were directly  
118 compared to those validated *in vivo* and found to be linked to specific protein loops within alleles  
119 verified previously<sup>6-8</sup> – BioML found each of those to be biologically important for abortion.

120 Further we located each of the top ranked alleles loops 1, 3, 4, 7 as enriched selection loci,  
121 again verifying previous wet lab observations<sup>6-8</sup>. Tetris plot derived variants that were not 100%  
122 identical with >75% protein homology, were designated as nonprototypical variants because the

123 sequence variation was high enough to change protein structures. In a limited set of alleles, the  
124 *porA* allele was so divergent that they were not variant called but were recovered with manual  
125 curation for this study. Recovery of these genes that were not initially identified created a third  
126 group of rare variant alleles that also caused abortion (Figure 4; protein homology <75 %). All of  
127 the variants were mapped to the whole genome phylogeny diversity as well rare variants that  
128 were not variant called by the reference genome (Figure 4). Prototypical allelic variants  
129 clustered in the largest genomic group of abortive isolates, as did some of the nonprototypical  
130 *porA* variants. However, there was significant genome variation and contained the two groups  
131 that caused abortion. Rare *porA* variants were distributed within different genomic groups as  
132 well as over a 15-year span between North America and the UK. The extensive allelic versions  
133 of *porA*, as well as the different genotypes, suggests that a genome surveillance system based  
134 on SNPs would be unsuccessful to link these genomes to a disease. In combination, these  
135 observations indicate that BioML produced a ranked list of biologically important alleles that  
136 were validated with those that were previously shown to be causal in abortion for the exact SNP  
137 and the protein loop location. Together, these observations verified that BioML was capable of  
138 accurately identifying the exact SNPs in *porA* that cause abortion.

139 Since each BioML allele was validated for accuracy to wet lab results correctly, we further  
140 examined the protein changes from the ranked alleles (Figure 5). The first six top ranked alleles  
141 changed the amino acids for each *porA* sequence, but each protein sequenced varied across all  
142 PorA models. However, lysine<sub>189</sub> was conserved across the extraintestinal variants and Asn was  
143 found in the intestinal alleles. Lysine mutation changes are the most impactful in membrane  
144 pore structure and are one of the tenets of membrane topology as positive inside rule<sup>12,13</sup>.  
145 Positive inside rule describes the observation across membrane pores that positively charged  
146 amino acids are found within the cytoplasm and negatively charged amino acids are in the  
147 extracellular domain. Membrane topology can radically change from being oriented inside the  
148 membrane (exposed to the periplasm in this case) to outside the membrane with a single lysine

149 mutation. Within the adjacent protein structure, lysine snorkeling effectively minimizes the  
150 nonpolar chain component by burying in the hydrophobic domain and at the same time expose  
151 the polar component to the aqueous domain is another single amino acid change which alters  
152 the topology of the membrane domain<sup>14</sup>. Bacterial membrane pore flipping could be a potential  
153 mechanism to avoid recognition by the immune system and enhancement of ion transport.  
154 While the counterpart position is buried in a deeper position due to insertional mutation in rare  
155 variants, the inserted amino acids contain lysine at new position 197. Additionally, insertions in  
156 the rare variants reduce the homology to < 75 % lead to more extensive protein structural  
157 changes that change the PorA arrangement in the membrane while still able to cause abortion.  
158 This situation is troublesome for traditional approaches but BioML effectively identified this  
159 situation.

160 This study utilized a combination of GWAS, population bacterial genomics, and machine  
161 learning to identify and rank allelic variants that correspond to biologically validated alleles of  
162 *porA* to cause abortion. BioML results were further supported by the longitudinal and spatial  
163 conservation of *porA* coupled to protein substitutions that led to biologically relevant changes in  
164 the structure to change activity. A Tetris plot visualization provided an avenue to discover  
165 divergent and rare variants that provided further insight with protein modelling that uncovered  
166 protein substitutions resulting in localization changes that affect activity and isolation localization  
167 in the host. Together these results demonstrate and validate a novel method, termed BioML, to  
168 discover biological mechanisms using population bacterial genomics. This approach provides  
169 an avenue to leverage the massive amount of bacterial genomic sequences to uncover new  
170 mechanisms of disease with potential to provide therapeutic approaches.

171

172 **Acknowledgement:**

173 DDB is grateful for the funding provided by the Philippine California Advanced Research

174 Institute and University of the Philippines Enhanced Creative Work and Research Grant to fund

175 his PhD program.

176

177 **Figure legends:**

178 **Figure 1.** Biological feature engineering of genomic data for machine learning analysis. A

179 critical step in feature engineering is selection of the appropriate comparison groups to enable

180 classification of alleles that are related to the specific phenotype of interest (i.e. intestinal

181 (controls; diarrheal; n=108) and extraintestinal (cases; abortive; n=85) (Step 1). Population-wide

182 allelic variants (red dot = intestinal, green dot = extraintestinal) that result from variant calling

183 (Step 2) and are used as the input features for machine learning analysis (Step 3). The

184 predicted model generated from the machine learning analysis is inspected for the most

185 predictive features using biological context, input, and protein modelling (Step 4) that represents

186 a nonsynonymous mutation from the genomic the population of allelic variants (n=193).

187

188 **Figure 2.** The conceptual framework diagram depicting machine learning in bacterial genome

189 wide association using extreme gradient boosting (XGboost). Boosting is a technique of

190 combining a set of weak classifiers or decision trees to increase prediction accuracy. Red dots

191 represent an allelic variant, each grey bar represents a unique allele. Individual decision trees

192 (1, 2, 3) fail to fully capture the allelic variants associated with the phenotype (e.g. extraintestinal

193 abortion), but by combining the trees together results in a process called as boosting increases

194 the discriminative power.

195

196 **Figure 3.** Comparative plot of SNP loci along the *proA* gene in all genomes. We termed this a

197 Tetris plot as an alternative visualization of genome wide association hits because they are

198 ranked and display only the loci that vary to produce a nonsynonymous mutation. The y-axis

199 contains individual genomes from the cases and the controls, while the x-axis contains the

200 GWAS SNP loci (green), the non-disease associated SNPs (red), open space (white) are loci

201 that are identical in the gene sequence. Temporal and geographic metadata on the right side of

202 the Tetris plot provides context for mutational enrichment over 30 years and multiple distant

203 locations in North America and the UK. The enriched SNP variation produced different protein



204 structures (far right in blue) as the corresponding protein model by location within the animal by  
205 SNP. Protein structural features corresponding to the ranked GWAS variants are annotated on  
206 top and below the plot are the nucleotide coordinates. Rare variants (homology <75%) was not  
207 included by the variant caller in this visualization but manual inspection provided a method to  
208 find these variants.

209  
210 **Figure 4.** Whole genome distance matrix using minhash depicting an all against all comparison  
211 of genome diversity for all isolates used in this study overlaid with the *porA* variant associated  
212 with body location and disease phenotype. Genotypes and *porA* variants are connected in this  
213 depiction to examine the association between intestinal/diarrheal location (yellow dot boxes),  
214 prototypical extraintestinal/abortive (red dot boxes), non-prototypical *porA* variants in  
215 extraintestinal/abortive (maroon lines), and rare *porA* variants in extraintestinal/abortive (grey  
216 dashed lines) were co-located to their respective genomes in the genotype map. For the non-  
217 prototypical variants, the year and location of isolation was included to depict the variation over  
218 time and space in the maintenance of a minority population of *porA* variants of extraintestinal  
219 abortive *Campylobacter jejuni*. The diagram to the right depicts the process used for this  
220 analysis.

221  
222 **Figure 5.** Protein models of the four groups of *porA* allelic variants that change the protein  
223 model structure relative to the isolate location in the host and the disease outcome. The amino  
224 acids corresponding with the BioML top ranked alleles are labelled in the common variant of  
225 *porA*, while the rest show the substituted amino acid in their respective position.

226  
227  
228 **List of Tables**

229 Table 1. Exemplar comparison of statistical metrics of GWAS versus machine learning metrics.

230 Allelic variant association with phenotype using XGboost. An allele can be very large, ~8,000 for  
231 *porA* for a pairwise comparison. Using a population of this gene from 200 genomes created a

232 population variation of 1.2 million variants that can be ranked with an estimation of importance

233 to association with the disease phenotype, abortion in this case.

234

### 235 **List of Supplemental Tables and Figures**

236 Supplemental Table 1. Ranked allelic variants using BioML

237 Supplemental Table 2. Metadata for extraintestinal *Campylobacter jejuni*

238 Supplemental Table 3. Metadata for intestinal *Campylobacter jejuni*

239 Supplemental Table 4. Confusion matrix and derived model metrics for the XGboost model with

240 extraintestinal *Campylobacter jejuni*. TP= True positive, FN= False Negative, FP= False

241 Positive, FN= False Negative.

242

### 243 **Methods**

#### 244 **Biological feature engineering**

245 Biological feature engineering entails selection of pertinent controls and cases for BioML

246 analysis. The genomes between gastrointestinal and extraintestinal abortive isolates. *C. jejuni*

247 controls were downloaded from Patric 3.5.28 (<https://www.patricbrc.org/>), June 1, 2019

248 (Supplemental Table 2). Abortive extraintestinal genomes of *C. jejuni* were obtained from the

249 Sequence Read Archive (SRA; Supplemental Table 3)<sup>8</sup>. Fastq files were assembled using

250 Shovill 1.0.4 (<https://github.com/tseemann/shovill>). Assembled files were annotated with Prokka

251 (version 1.13.3)<sup>15</sup>. Variant calling was done with the reference sequence *C. jejuni* NTC11168

252 with Snippy 4.3.5 (<https://github.com/tseemann/snippy>) as previously described<sup>16</sup>.

253

#### 254 **Gradient tree boosting as GWAS framework**

255 GWAS variants generated from the biological feature engineering step were used as input for

256 XGboost. The source code for implementing gradient tree boosting is available at

257 <https://xgboost.readthedocs.io/>. Confusion matrix were generated and used to assess the

258 performance of the model (Supplemental Table 4). The relative importance of the predictive

259 model was used as the GWAS hits.

260

261 **Tetris plot**

262 Classical GWAS hits are displayed as the negative logarithm of the p-value in Manhattan plots,  
263 hence we formulated a novel visualization of the ranked alleles generated by the machine  
264 learning model to highlight the difference between approaches - we call this GWAS hit  
265 visualization a Tetris plot. We color coded the relative importance values of the associated  
266 alleles derived from the XGboost (green being associated and red being non-associated). The  
267 source genome is plotted on the y-axis and genomic coordinates on the x-axis overlaid with  
268 GWAS hits presence or absence matrix.

269

270 **Population wide whole genome phylogeny**

271 The genome distance metric was calculated using genome wide k-mer signatures to generate  
272 the population-wide phylogeny with a k-mer size of 31 scaled to 1000 with Sourmash<sup>17</sup>. The  
273 resulting genome wide k-mer distance was visualized as an all-against-all heatmap<sup>17</sup>.

274

275 **Protein Modelling**

276 Assembled genomes were annotated using Prokka (V1.13.3) and PorA protein sequences were  
277 extracted for protein modelling using Swiss Model<sup>18,19</sup>. The most homologous protein was used  
278 as template for protein modelling. Illustrate (<https://ccsb.scripps.edu/illustrate/>) was used to  
279 generate the protein visualization of the predictive alleles. Ranked BioML alleles identified by  
280 visual inspection of the Tetris plot, via the ranked variable importance were used to inspect the  
281 protein structures.

282

283

284 Table 1.

|        | GWAS statistical metrics |                              | Machine Learning coupled to GWAS metrics |                         |
|--------|--------------------------|------------------------------|------------------------------------------|-------------------------|
| Allele | GWAS p-value             | Bonferonni Corrected p-value | Candidate Ranking                        | Feature Importance      |
| $X_1$  | 0.001                    | $8.3 \times 10^{-10}$        | 1                                        | 80                      |
| $X_2$  | 0.001                    | $8.3 \times 10^{-10}$        | 2                                        | 75                      |
| $X_3$  | 0.001                    | $8.3 \times 10^{-10}$        | 3                                        | 70                      |
| $X_n$  | 0.001                    | $8.3 \times 10^{-10}$        | Rank <sub>n</sub>                        | Importance <sub>n</sub> |

285  
286  
287

288  
289  
290  
291  
292  
293  
294  
295  
296  
297  
298  
299  
300  
301  
302  
303  
304  
305  
306  
307  
308  
309  
310  
311  
312  
313  
314  
315  
316  
317  
318  
319  
320  
321  
322  
323  
324  
325  
326  
327  
328  
329  
330  
331

## References

- 1 Page, A. J. *et al.* Roary: rapid large-scale prokaryote pan genome analysis. *Bioinformatics* **31**, 3691-3693, doi:10.1093/bioinformatics/btv421 (2015).
- 2 Power, R. A., Parkhill, J. & de Oliveira, T. Microbial genome-wide association studies: lessons from human GWAS. *Nat Rev Genet* **18**, 41-50, doi:10.1038/nrg.2016.132 (2017).
- 3 Johnson, R. C. *et al.* Accounting for multiple comparisons in a genome-wide association study (GWAS). *BMC Genomics* **11**, 724, doi:10.1186/1471-2164-11-724 (2010).
- 4 Breiman, L. Statistical Modeling: The Two Cultures. *Statistical Science* **16**, doi:10.1214/ss/1009213726 (2001).
- 5 Read, T. D. & Massey, R. C. Characterizing the genetic basis of bacterial phenotypes using genome-wide association studies: a new direction for bacteriology. *Genome Med* **6**, doi:ARTN 109 10.1186/s13073-014-0109-z (2014).
- 6 Weis, A. M., Clothier, K. A., Huang, B. C., Kong, N. & Weimer, B. C. Draft Genome Sequences of *Campylobacter jejuni* Strains That Cause Abortion in Livestock. *Genome Announc* **4**, doi:10.1128/genomeA.01324-16 (2016).
- 7 Weis, A. M. *et al.* Genomic Comparison of *Campylobacter* spp. and Their Potential for Zoonotic Transmission between Birds, Primates, and Livestock. *Appl Environ Microbiol* **82**, 7165-7175, doi:10.1128/AEM.01746-16 (2016).
- 8 Wu, Z. *et al.* Point mutations in the major outer membrane protein drive hypervirulence of a rapidly expanding clone of *Campylobacter jejuni*. *Proc Natl Acad Sci U S A* **113**, 10690-10695, doi:10.1073/pnas.1605869113 (2016).
- 9 Chen, T. & Guestrin, C. in *Proceedings of the 22nd ACM SIGKDD International Conference on Knowledge Discovery and Data Mining - KDD '16* 785-794 (2016).
- 10 Behravan, H. *et al.* Machine learning identifies interacting genetic variants contributing to breast cancer risk: A case study in Finnish cases and controls. *Sci Rep* **8**, 13149, doi:10.1038/s41598-018-31573-5 (2018).
- 11 Jason H. Yang, S. N. W., Meagan Hamblin, Douglas McCloskey, Miguel A. Alcantar, Lars Schrübbers, Allison J. Lopatkin, Sangeeta Satish, Amir Nili, Bernhard O. Palsson, Graham C. Walker, James J. Collins. A White-Box Machine Learning Approach for Revealing Antibiotic Mechanisms of Action. *Cell* **177**, 1649-1661, doi:<https://doi.org/10.1016/j.cell.2019.04.016> (2019).
- 12 Heijne, J. N. a. G. Fine-tuning the topology of a polytopic membrane protein: Role of positively and negatively charged amino acids. *Cell* **62**, 1135-1141, doi:[https://doi.org/10.1016/0092-8674\(90\)90390-Z](https://doi.org/10.1016/0092-8674(90)90390-Z) (1990).
- 13 Elazar, A., Weinstein, J. J., Prilusky, J. & Fleishman, S. J. Interplay between hydrophobicity and the positive-inside rule in determining membrane-protein topology. *Proc Natl Acad Sci U S A* **113**, 10340-10345, doi:10.1073/pnas.1605888113 (2016).
- 14 Kim, C. *et al.* Basic amino-acid side chains regulate transmembrane integrin signalling. *Nature* **481**, 209-213, doi:10.1038/nature10697 (2011).
- 15 Seemann, T. Prokka: rapid prokaryotic genome annotation. *Bioinformatics* **30**, 2068-2069, doi:10.1093/bioinformatics/btu153 (2014).

- 332 16 Bandoy, D. Pangenome guided pharmacophore modelling of enterohemorrhagic  
333 Escherichia coli sdiA. *F1000Research*  
334 doi:<https://doi.org/10.12688/f1000research.17620.1> (2019).
- 335 17 Brown, T. a. l., Luis. sourmash: a library for MinHash sketching of DNA. *Journal of Open*  
336 *Source Software* **1**, 27, doi:10.21105/joss.00027 (2016).
- 337 18 Waterhouse, A. *et al.* SWISS-MODEL: homology modelling of protein structures and  
338 complexes. *Nucleic Acids Res* **46**, W296-W303, doi:10.1093/nar/gky427 (2018).
- 339 19 Bienert, S. *et al.* The SWISS-MODEL Repository-new features and functionality. *Nucleic*  
340 *Acids Res* **45**, D313-D319, doi:10.1093/nar/gkw1132 (2017).
- 341

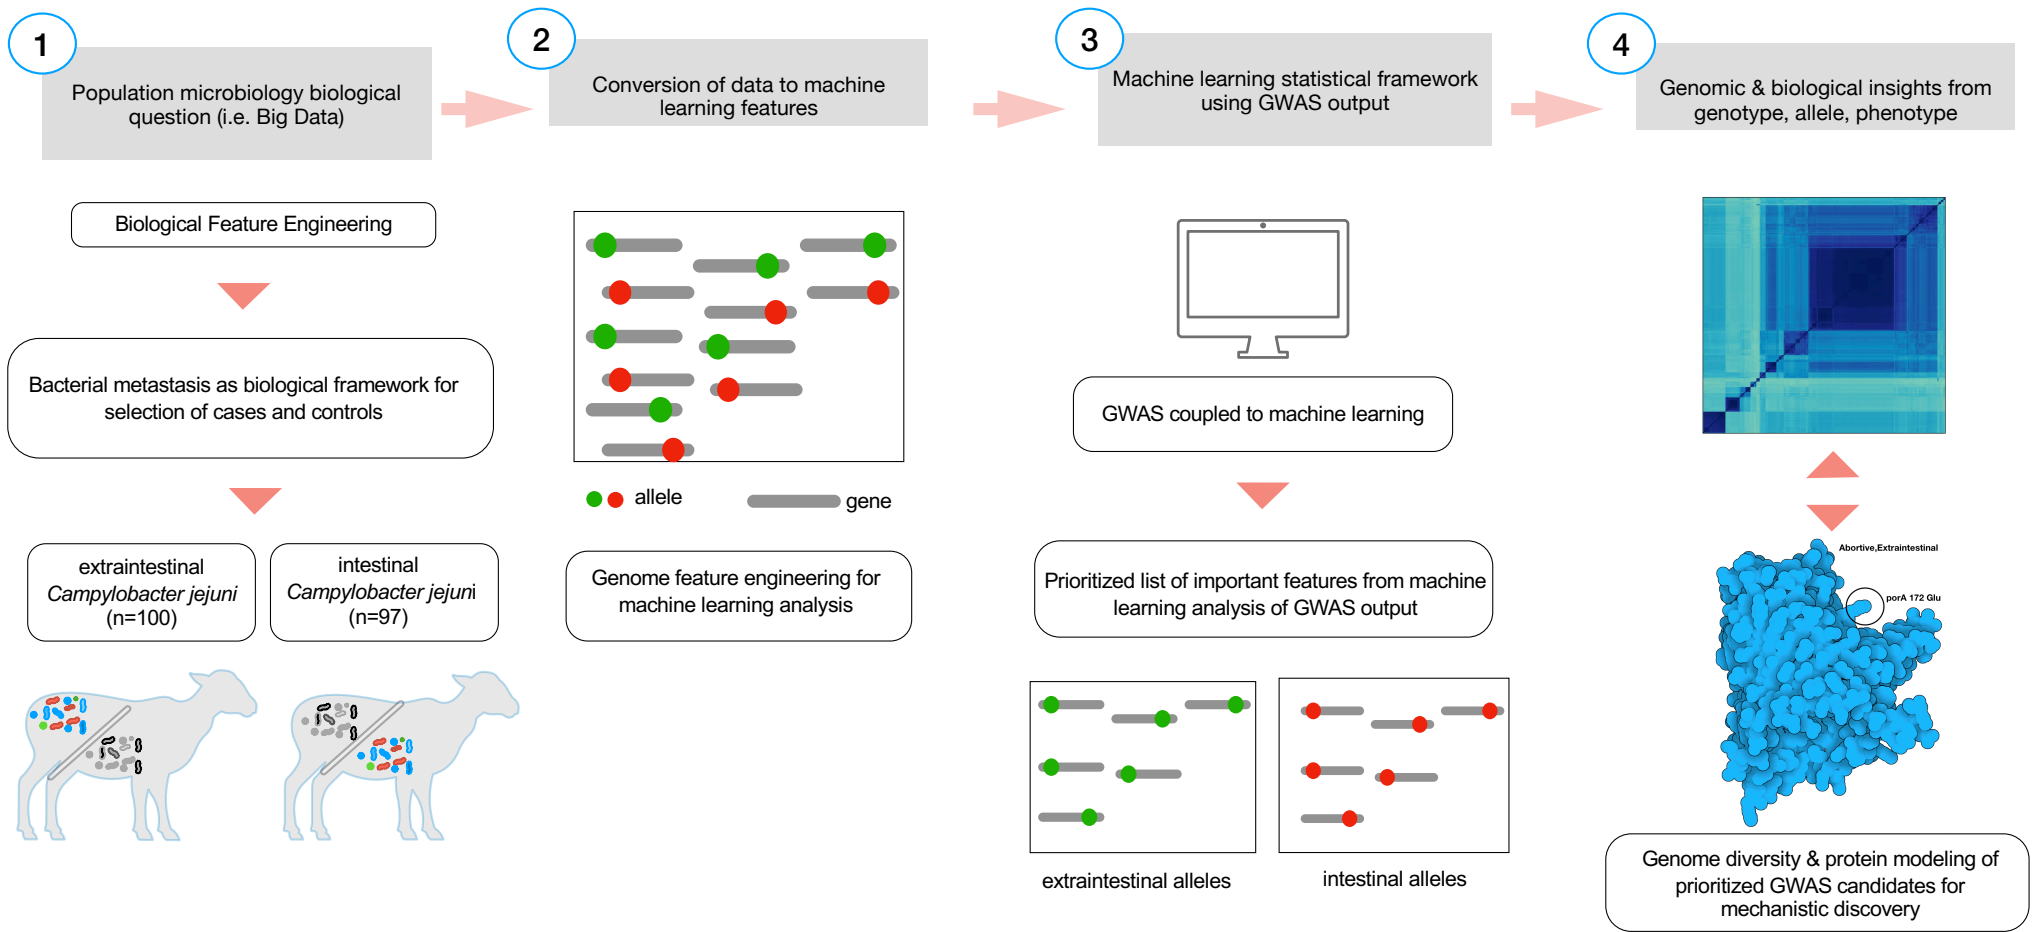

Fig 1.

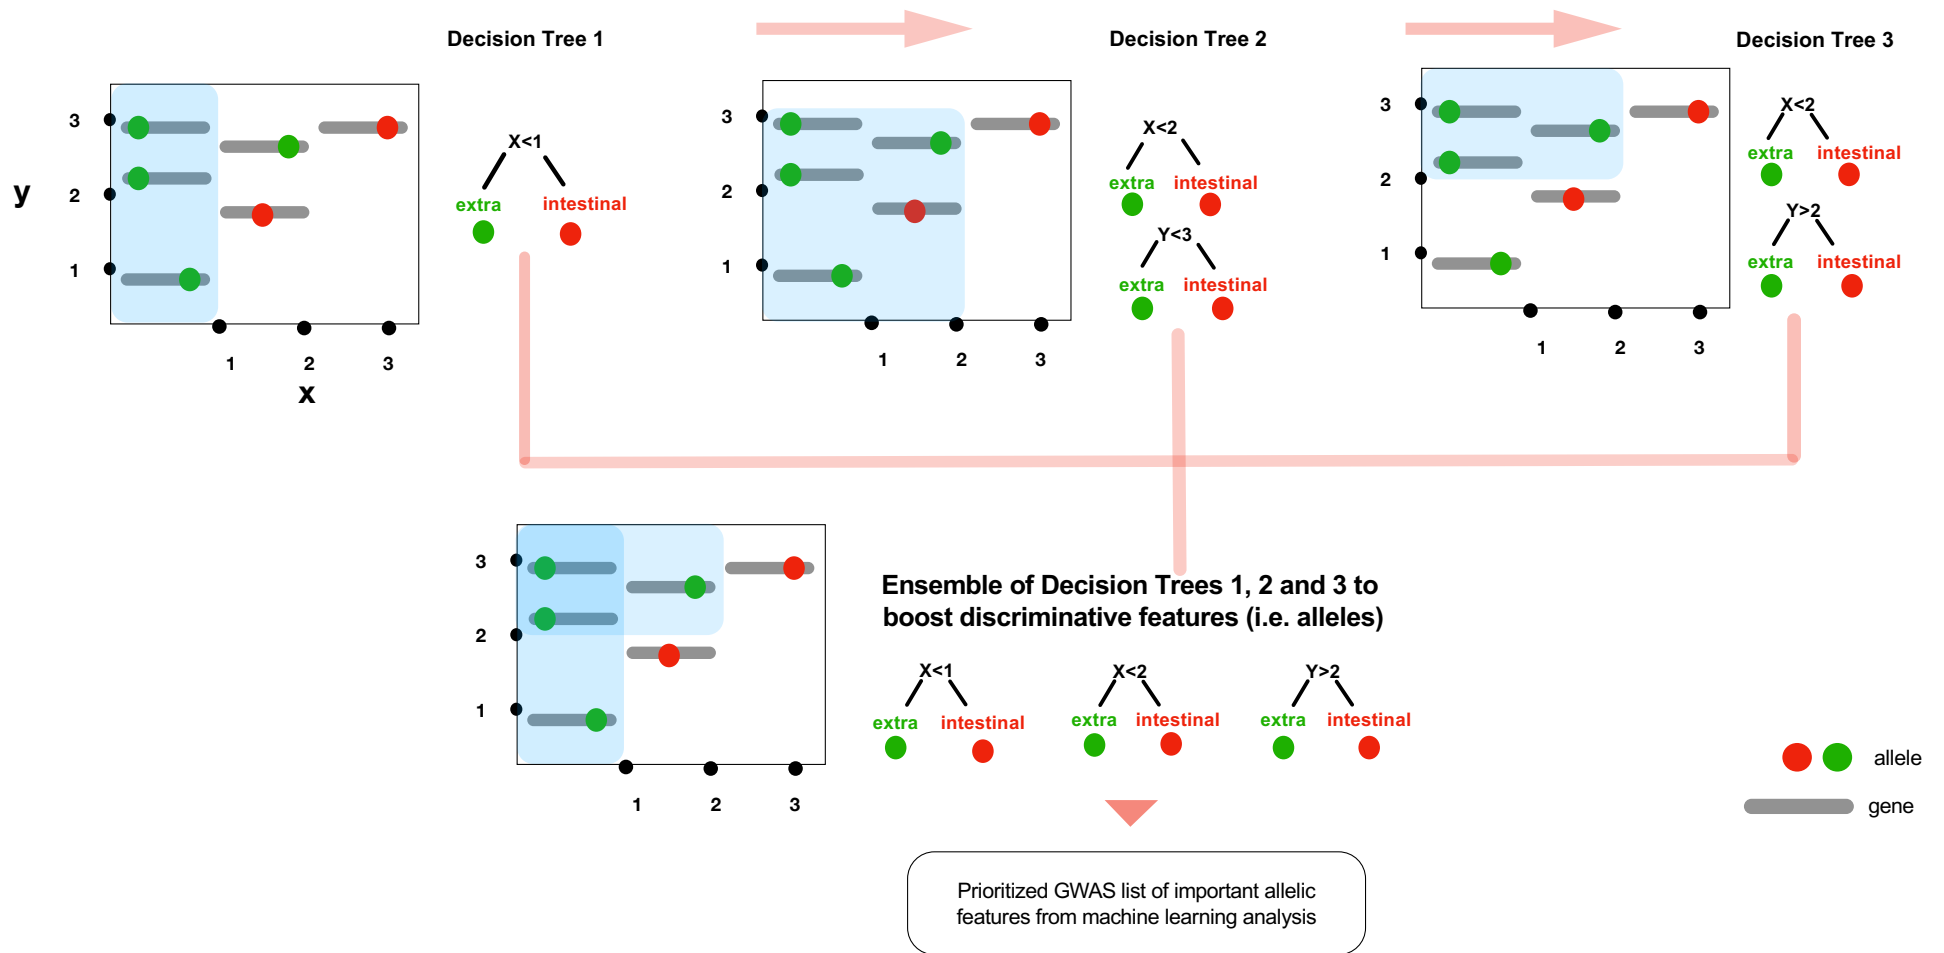

Fig 2.



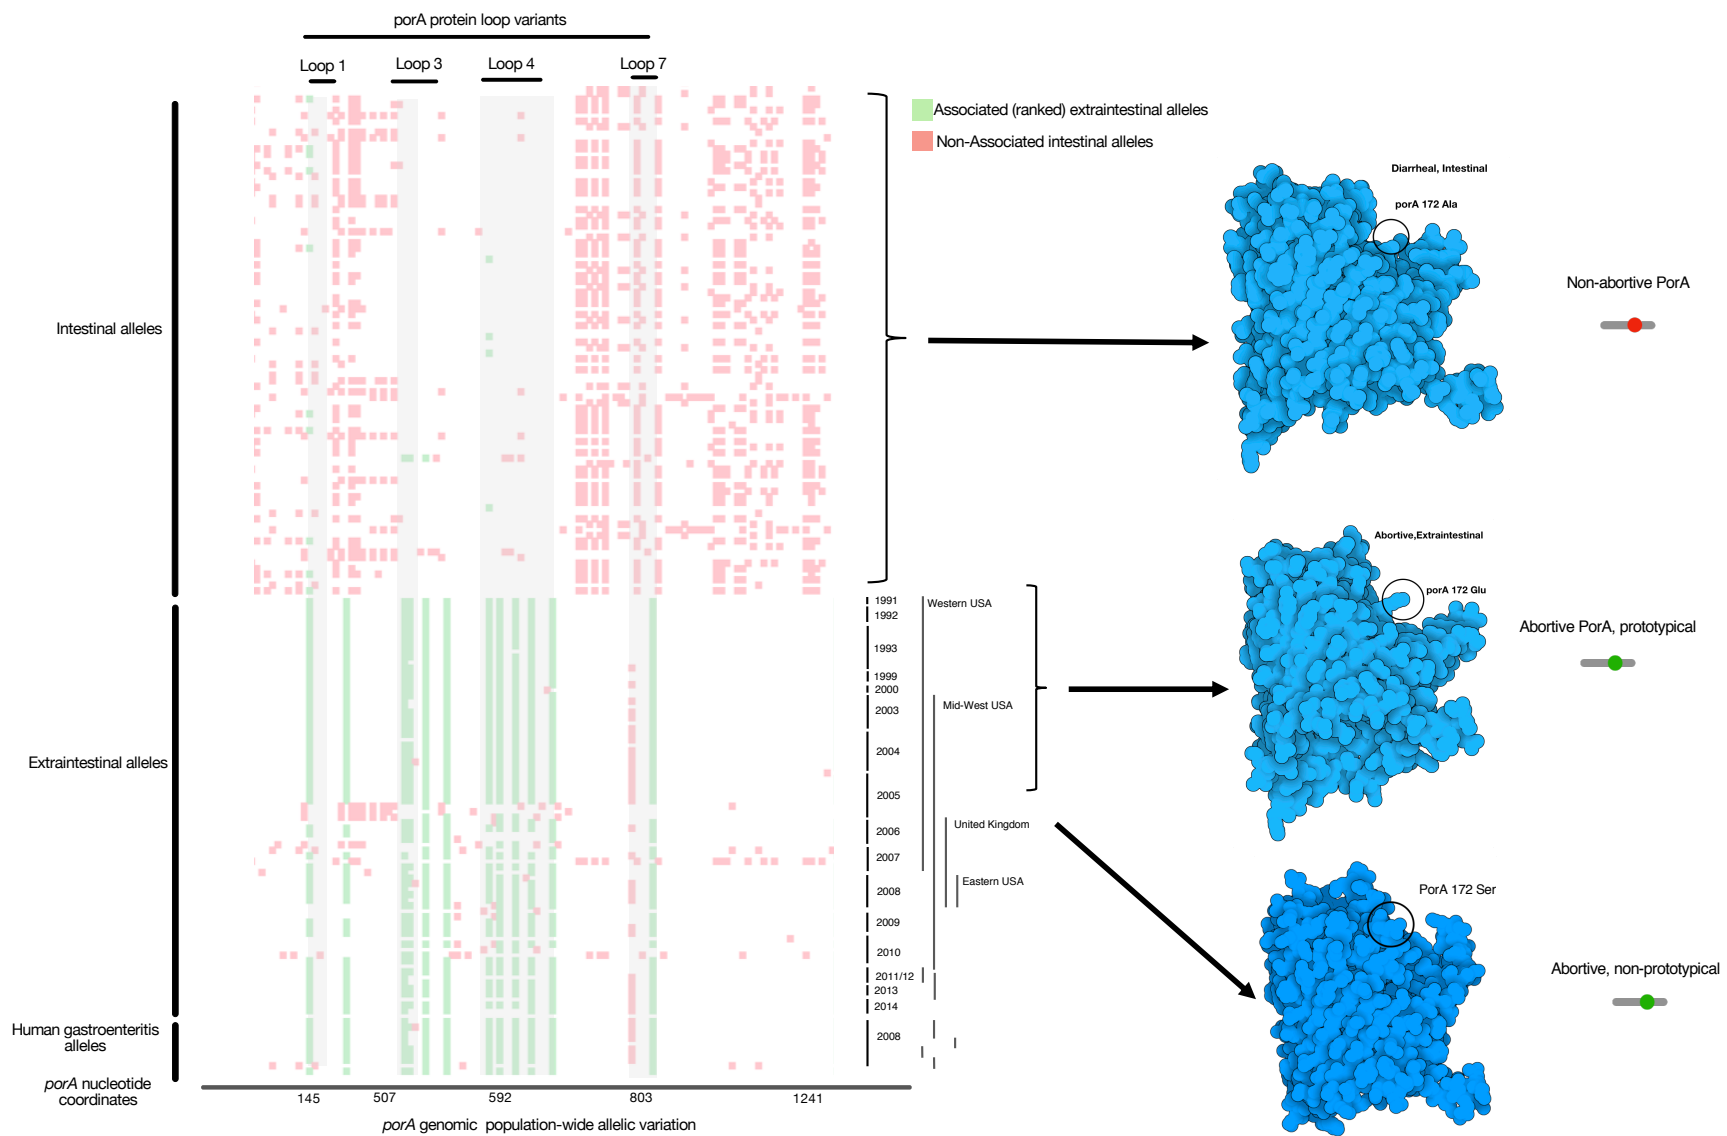

Fig 3.

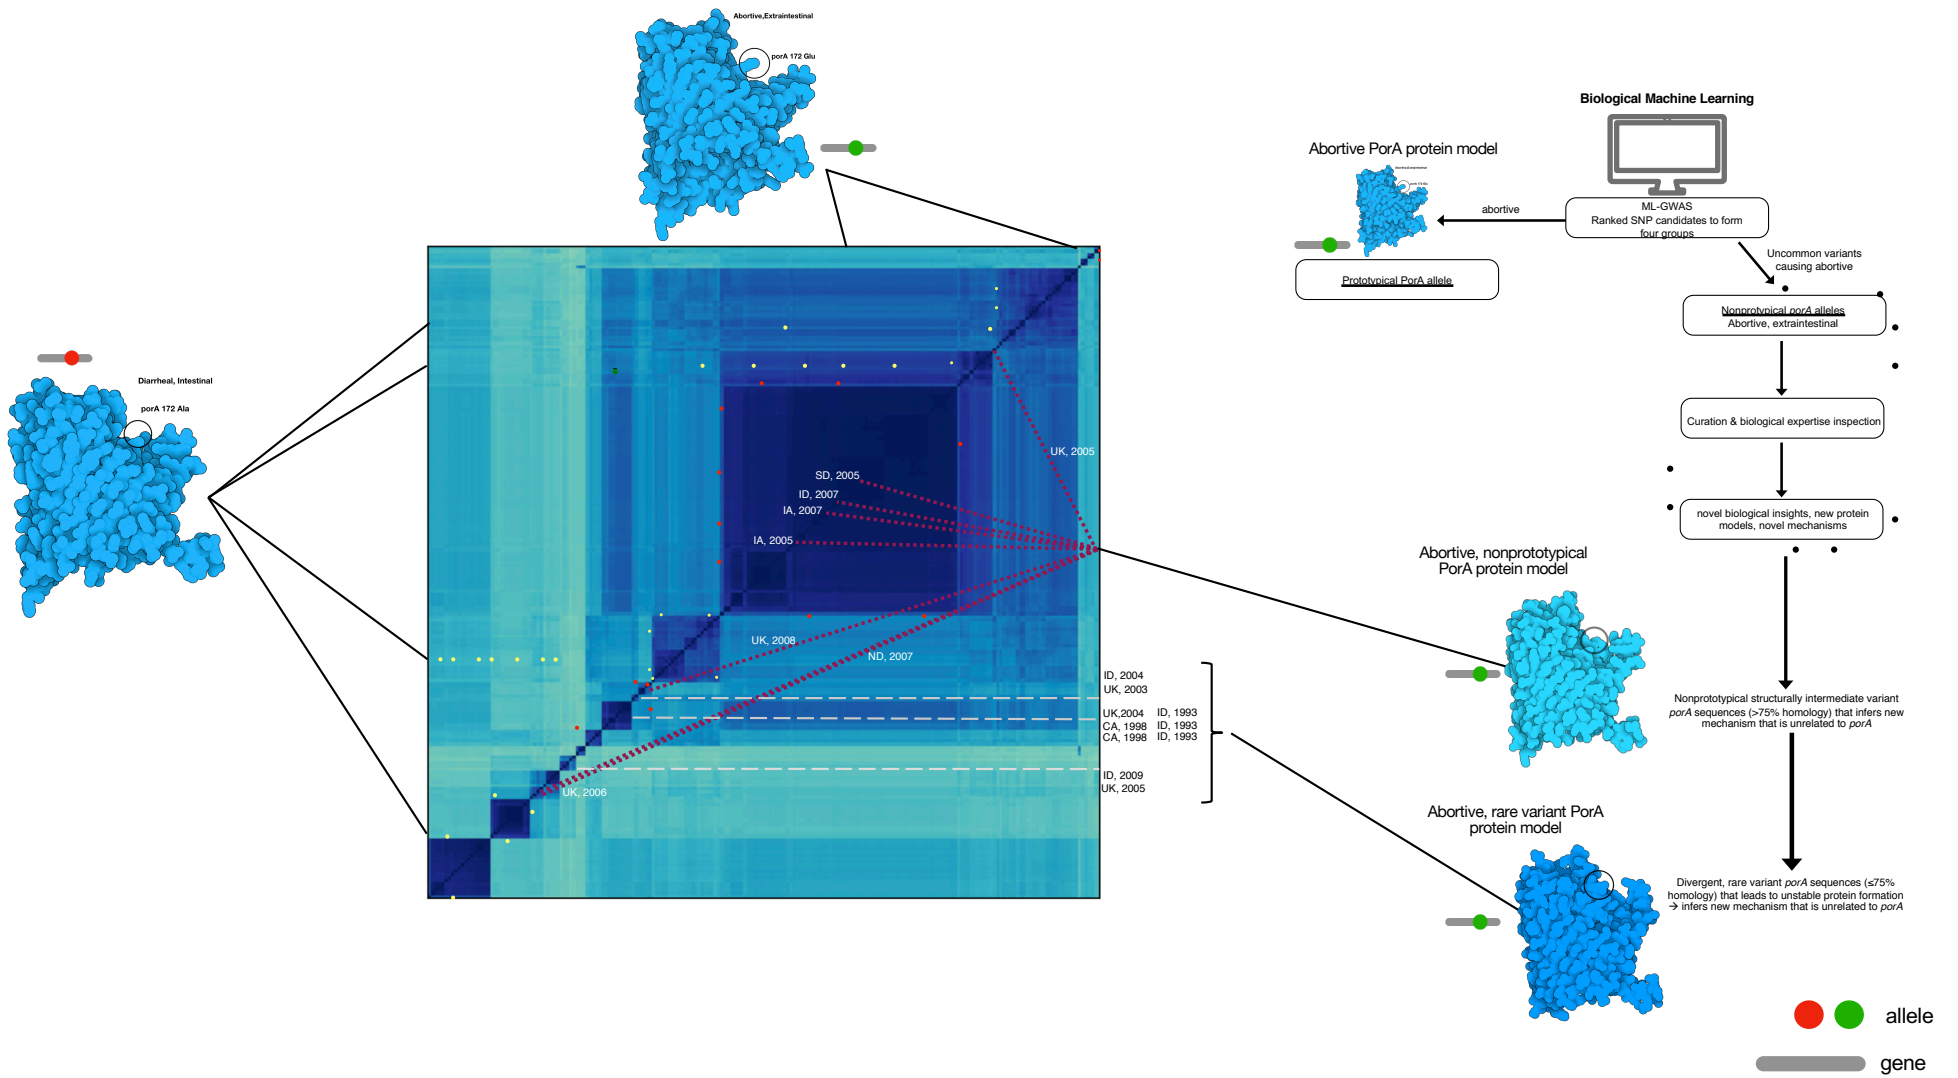

Figure 4

Diarrheal

Intestinal

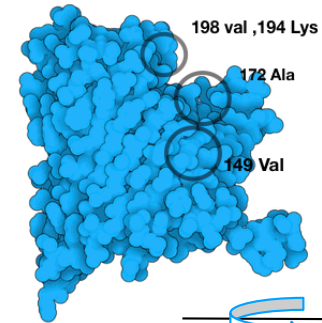

ML-GWAS  
Flanked allele with amino acid in the abortive prototypical extraintestinal allele

1. 172 Glu
3. 198 Leu
5. 149 Ile
7. 194 Gln

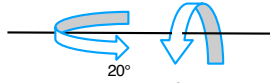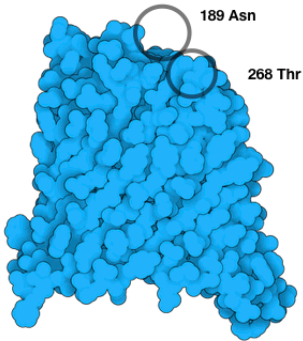

2. 268 Arg
6. 189 Lys

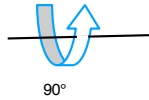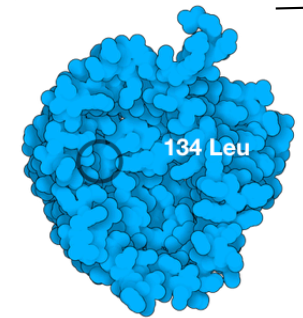

8. 134 Thr

Abortive

Prototypical extraintestinal

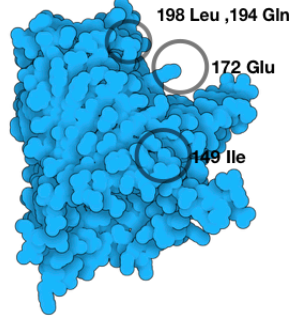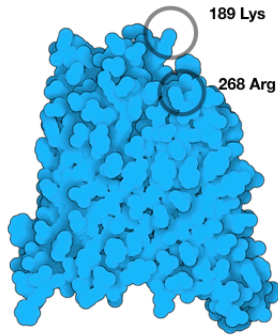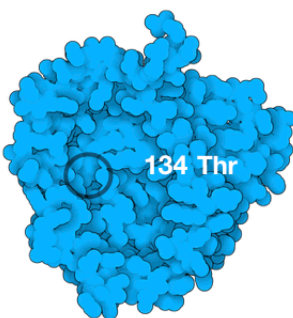

Non-prototypical extraintestinal

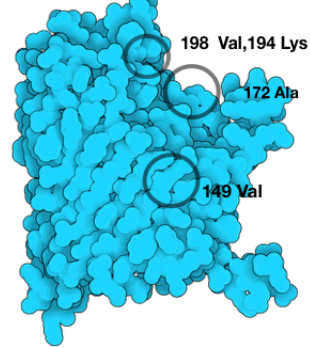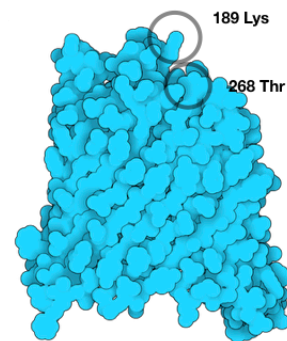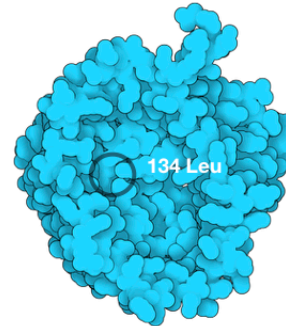

Rare variant extraintestinal

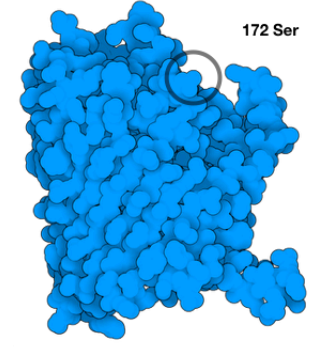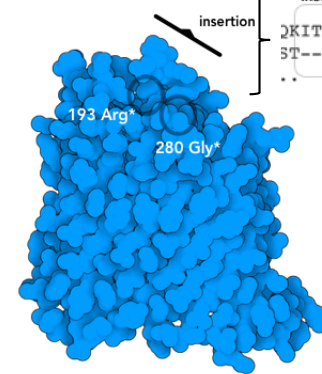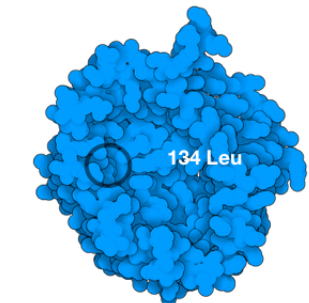

counterpart amino acids have been buried deeper, the amino acids are the counterpart of the alleles position as per alignment

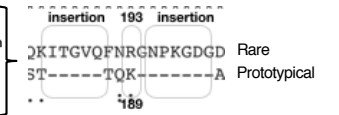

The indels resulted in the corresponding amino acids to be buried deeper into the structure. The amino acids were corrected in location number to represent the counterpart of the alleles position as per alignment

Bottom up view of the protein looking up through the barrel that is hidden in this view
